# Supplementary figures and images for: Early Experience Using a New Robotic Microsurgical System for Lymphatic Surgery
Source: PubMed Central journal article supplement — Plast Reconstr Surg Glob Open. 2022 Jan 10;10(1):e4013. doi: 10.1097/GOX.0000000000004013 (PMC8747501; doi:10.1097/gox.0000000000004013), 2022-01-10

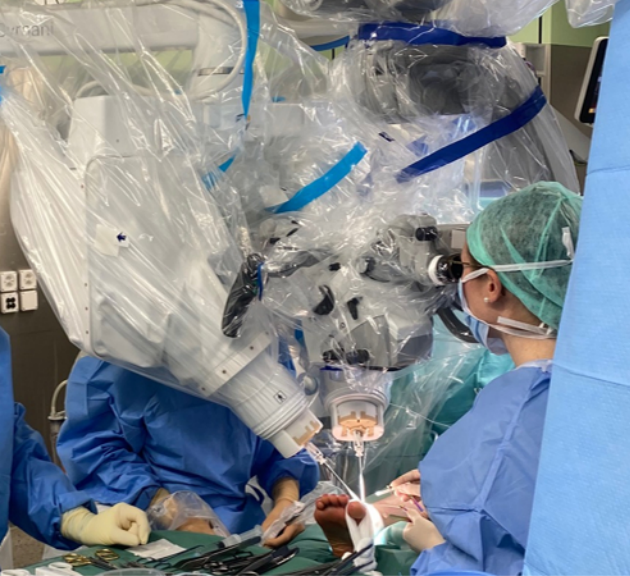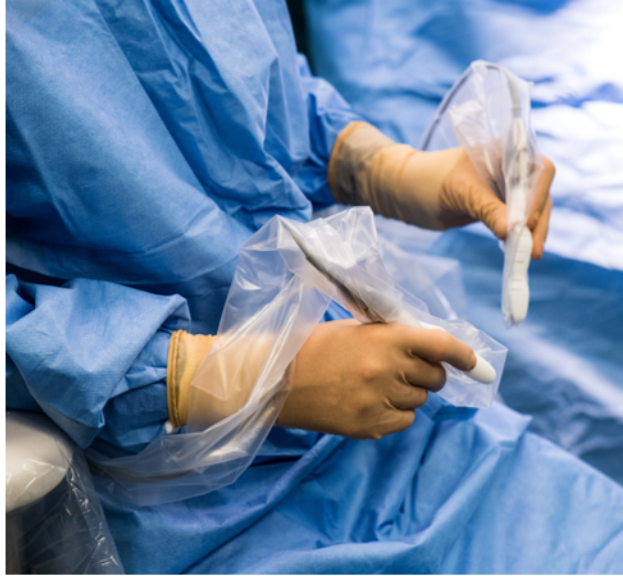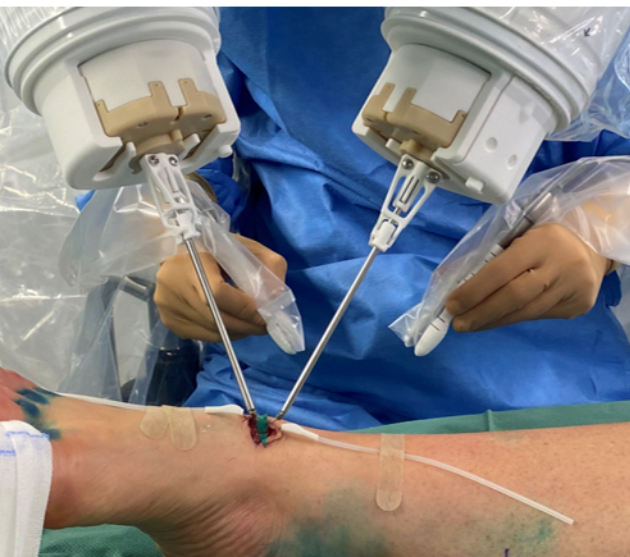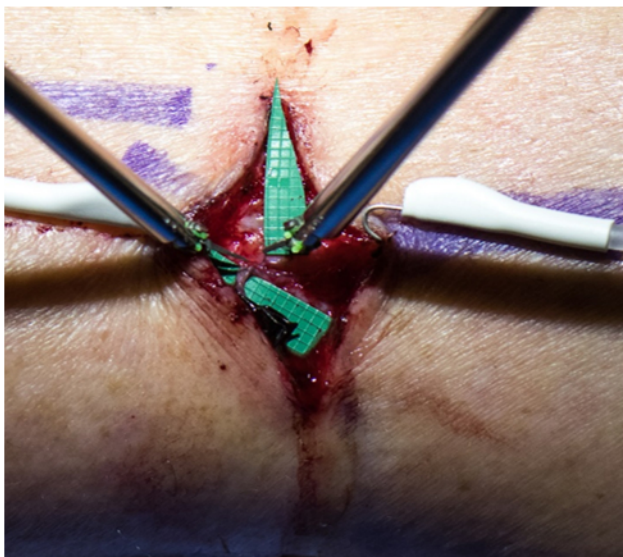

Supplement: gox-10-e4013-s004.pdf [file gox-10-e4013-s004.pdf]

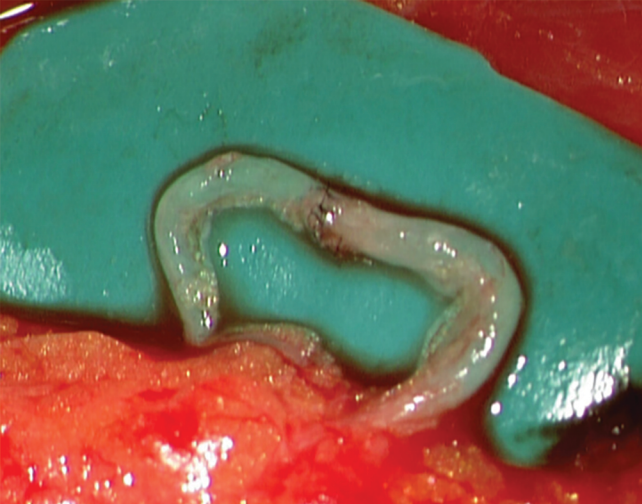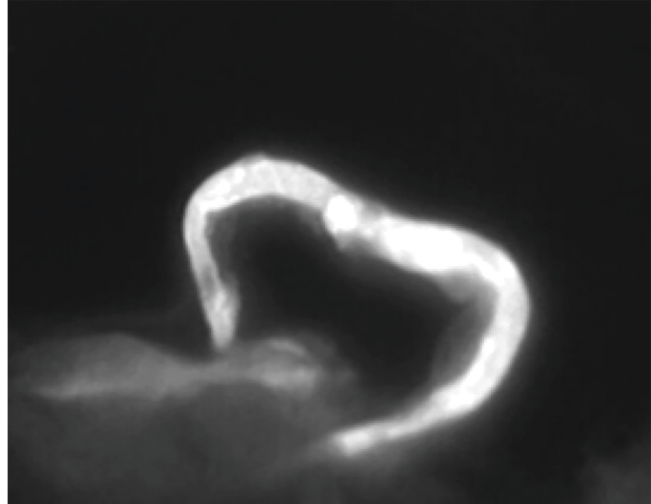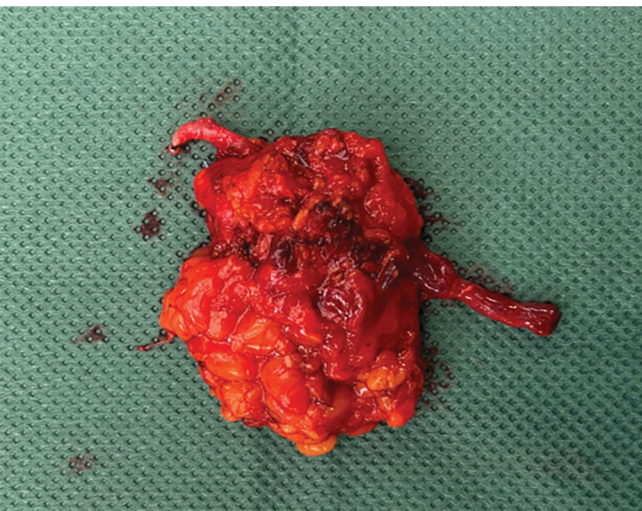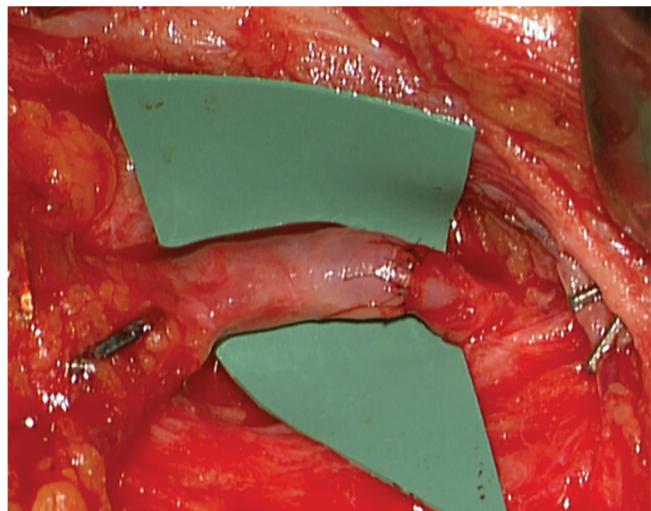

Supplement: gox-10-e4013-s005.pdf [file gox-10-e4013-s005.pdf]
